# Supplementary material
Source: MDPI journal article supplement (https://www.mdpi.com/search?q=bioengineering-09-00129)
Supplement: s001 [file bioengineering-09-00129-s001.zip]

**Table S1.** Summary of quality assessments using JBI appraisal checklist.

| Author               | Study type                 | Items on Joanna Briggs Institute |    |    |    |    |    |    |    | Raw score and % | Risk     |
|----------------------|----------------------------|----------------------------------|----|----|----|----|----|----|----|-----------------|----------|
|                      |                            | Q1                               | Q2 | Q3 | Q4 | Q5 | Q6 | Q7 | Q8 |                 |          |
| F.Vallone (2019)     | Clinical practice          | 0                                | 0  | 1  | 1  | 1  | 1  | 1  | 1  | 6/8 = 75.0%     | Low      |
| G.Marchesi (2019)    | Clinical practice          | 1                                | 1  | 1  | 1  | 1  | 1  | 1  | 1  | 8/8 = 100%      | Low      |
| G.Marchesi (2020)    | Clinical practice          | 0                                | 1  | 1  | 1  | 1  | 1  | 1  | 1  | 7/8 = 87.5%     | Low      |
| A.Leo (2018)         | Clinical practice          | 0                                | 0  | 1  | 1  | 1  | U  | 0  | 1  | 4/8 = 50.0%     | Moderate |
| M.G.Maggio (2021)    | Single case                | 1                                | 1  | 1  | 1  | 1  | U  | 1  | 1  | 7/8 = 87.5%     | Low      |
| M. Girone (2000)     | Case study                 | 0                                | 0  | 1  | 1  | 1  | 1  | 1  | 1  | 6/8 = 75.0%     | Low      |
| J. E. Deutsch (2001) | Case series                | 0                                | 0  | 1  | 1  | 1  | 1  | 1  | 1  | 6/8 = 75.0%     | Low      |
| J. E. Deutsch (2001) | Before-after, Single case  | 1                                | 1  | 1  | U  | 1  | 1  | U  | 1  | 6/8 = 75.0%     | Low      |
| R. F. Boian (2002)   | Case series                | 0                                | 1  | 1  | 1  | 1  | 1  | 1  | 1  | 7/8 = 87.5%     | Low      |
| R. F. Boian (2003)   | Case series                | 0                                | 0  | 1  | 1  | 1  | U  | 1  | 1  | 5/8 = 62.5%     | Moderate |
| J. E. Deutsch (2004) | Case series                | 0                                | 1  | 1  | 1  | 1  | U  | 1  | 1  | 6/8 = 75.0%     | Low      |
| R. W. Selles (2005)  | Single case series         | 1                                | 1  | 1  | 1  | 1  | 1  | 1  | 1  | 8/8 = 100%      | Low      |
| D. Cioi (2011)       | Single case                | 0                                | 0  | 1  | 1  | 1  | 1  | 1  | 1  | 6/8 = 75.0%     | Low      |
| G. C. Burdea (2012)  | Case study                 | 1                                | 1  | 1  | 1  | 1  | 1  | 1  | 1  | 8/8 = 100%      | Low      |
| L.Q.Zhang (2002)     | Before-after, case control | 0                                | 1  | 1  | 1  | 1  | 1  | U  | 1  | 6/8 = 75.0%     | Low      |
| J.E. Deutsch (2007)  | Before-after               | 0                                | 0  | 1  | 1  | 1  | U  | U  | 1  | 4/8 = 50.0%     | Moderate |
| K. Homma (2007)      | Case control, single case  | 0                                | 1  | 1  | 1  | 0  | u  | 1  | 1  | 5/8 = 62.5%     | Moderate |
| P. Cordo (2009)      | Before-after               | 0                                | 1  | 1  | 1  | 1  | 1  | 1  | 1  | 7/8 = 87.5%     | Low      |
| Y-N. Wu (2011)       | Before-after               | 1                                | 1  | 1  | 1  | 1  | 1  | 1  | 1  | 8/8 = 100%      | Low      |
| G. Waldman (2013)    | Before-after               | 0                                | 1  | 1  | 1  | 1  | 1  | U  | 1  | 6/8 = 75.0%     | Low      |
| L. Pendolino (2019)  | Single case                | 0                                | 1  | 1  | 1  | U  | 1  | 0  | 1  | 5/8 = 62.5%     | Moderate |
| M. Burlando (2019)   | Single case                | 0                                | 1  | 1  | 1  | 1  | 1  | 1  | 1  | 7/8 = 87.5%     | Low      |
| A. Leo (2019)        | Single case                | 0                                | 1  | 1  | 1  | 0  | 1  | 0  | 1  | 5/8 = 62.5%     | Moderate |
| A. Di Matteo (2019)  | Case study                 | 0                                | 1  | 1  | 1  | 1  | 1  | 0  | 1  | 6/8 = 75.0%     | Low      |
| V. Da Pieve (2019)   | Single case                | 0                                | 1  | 1  | 1  | 1  | 1  | 1  | 1  | 7/8 = 87.5%     | Low      |
| M. Escelsior (2020)  | Single case                | 0                                | 1  | 1  | 1  | 1  | U  | 0  | 1  | 5/8 = 62.5%     | Moderate |
| P. Barbero (2020)    | Single case                | 0                                | 1  | 1  | 1  | 1  | U  | 0  | 1  | 5/8 = 62.5%     | Moderate |
| G. Risicato (2020)   | Single case                | 1                                | 1  | 1  | U  | 1  | 0  | 0  | 1  | 5/8 = 62.5%     | Moderate |
| U.Nguyen (2021)      | Single case                | 0                                | 1  | 1  | 1  | 1  | 1  | 1  | 1  | 7/8 = 87.5%     | Low      |
| Z. Zhou (2015)       | Case-control               | 1                                | 1  | 1  | 1  | 1  | 0  | 1  | 1  | 7/8 = 87.5%     | Low      |

**JBI Criteria to be scored:** Q1. Were patient's demographic characteristics clearly described; Q2. Was the patient's history clearly described and presented as a timeline; Q3. Was the current clinical condition of the patient on presentation clearly described; Q4. Were diagnostic tests or assessment methods and the results clearly described; Q5. Was the intervention(s) or treatment procedure(s) clearly described; Q6. Was the post-intervention clinical condition clearly described; Q7. Were adverse events (harms) or unanticipated events identified and described; Q8. Does the case report provide takeaway lessons. 1 = Yes, 0 = No, and U = Unclear.

**Abbreviations:** 1 = Yes; 0 = No; U = Unclear; NA = Not Applicable; JBI: Joanna Briggs Institute

#### Criteria used to rank the risk of bias

- i)  $\leq 49\%$  = high risk of Bias
- ii) 50% and 69% = Moderate risk of Bias (9 studies)
- iii) Above 70% = low risk of Bias (21 studies)

**Table S2.** Summary of quality assessments (Longitudinal Prospective and RCTs) using JBI appraisal checklist.

| Author            | Study type               | Items on Joanna Briggs Institute tool |    |    |    |    |    |    |    |    |     |     |     |     | Raw score and % | Risk     |
|-------------------|--------------------------|---------------------------------------|----|----|----|----|----|----|----|----|-----|-----|-----|-----|-----------------|----------|
|                   |                          | Q1                                    | Q2 | Q3 | Q4 | Q5 | Q6 | Q7 | Q8 | Q9 | Q10 | Q11 | Q12 | Q13 |                 |          |
| A.De Luca (2020)  | RCT                      | 1                                     | 0  | 1  | 1  | 0  | 1  | 0  | 1  | 1  | 1   | 1   | 1   | 1   | 10/13 = 77.0%   | Low      |
| E.Taglione (2015) | RCT                      | 1                                     | 0  | 0  | 1  | 0  | U  | 0  | 1  | U  | 0   | 1   | U   | 1   | 5/13 = 38.5%    | High     |
| E.Taglione (2018) | RCT                      | 1                                     | 0  | 0  | 0  | 0  | U  | 1  | U  | 1  | 0   | 1   | U   | U   | 4/13 = 30.8%    | High     |
| F.Vallone (2018)  | RCT                      | 1                                     | 0  | 0  | 0  | 0  | 0  | U  | 1  | U  | 1   | 1   | 1   | 1   | 6/13 = 46.0%    | High     |
| S.Spina (2021)    | RCT                      | 1                                     | 0  | 0  | 1  | 1  | 1  | U  | 1  | 1  | 1   | 1   | U   | 1   | 9/13 = 69.2%    | Moderate |
| A.Mirelman (2008) | RCT                      | 1                                     | 1  | 0  | 1  | 1  | U  | 0  | 1  | 1  | 1   | 1   | 1   | 1   | 10/13 = 77.0%   | Low      |
| A. Cella (2020)   | Longitudinal prospective | 0                                     | 1  | 1  | 1  | 1  | 1  | 1  | 0  | 1  | 0   | 1   | NA  | NA  | 8/11 = 72.7%    | Low      |
| A. Cella (2019)   | Longitudinal prospective | 0                                     | 1  | 1  | 1  | 1  | 1  | 1  | 0  | 1  | 0   | 1   | NA  | NA  | 8/11 = 72.7%    | Low      |

**JBI Critical Appraisal Checklist for RCTs to be scored:** Q1. Was true randomization used for assignment of participants to treatment groups; Q2. Was allocation to treatment groups concealed; Q3. Were treatment groups similar at the baseline; Q4. Were participants blind to treatment assignment; Q5. Were those delivering treatment blind to treatment assignment; Q6. Were outcomes assessors blind to treatment assignment; Q7. Were treatment groups treated identically other than the intervention of interest; Q8. Was follow up complete and if not, were differences between groups in terms of their follow up adequately described and analyzed; Q9. Were participants analyzed in the groups to which they were randomized; Q10. Were outcomes measured in the same way for treatment groups; Q11. Were outcomes measured in a reliable way; Q12. Was appropriate statistical analysis used; Q13. Was the trial design appropriate, and any deviations from the standard RCT design (individual randomization, parallel groups) accounted for in the conduct and analysis of the trial.

**JBI Critical Appraisal Checklist for Longitudinal prospective Studies to be scored:** Q1. Were the two groups similar and recruited from the same population; Q2. Were the exposures measured similarly to assign people to both exposed and unexposed groups; Q3. Was the exposure measured in a valid and reliable way; Q4. Were confounding factors identified; Q5. Were strategies to deal with confounding factors stated; Q6. Were the groups/participants free of the outcome at the start of the study (or at the moment of exposure); Q7. Were the outcomes measured in a valid and reliable way; Q8. Was the follow up time reported and sufficient to be long enough for outcomes to occur; Q9. Was follow up complete, and if not, were the reasons to loss to follow up described and explored; Q10. Were strategies to address incomplete follow up utilized; Q11. Was appropriate statistical analysis used?

**Abbreviations:** 1 = Yes; 0 = No; U = Unclear; RCT = Randomized controlled trial; NA = Not Applicable; JBI: Joanna Briggs Institute

**Criteria used to rank the risk of bias:**

- i)  $\leq 49\%$  = high risk of Bias (3 studies)
- ii) 50% and 69% = Moderate risk of Bias (1 study)
- iii) above 70% = low risk of Bias (4 studies)
